# Supplementary material for: AVA-NP-695 Selectively Inhibits ENPP1 to Activate STING Pathway and Abrogate Tumor Metastasis in 4T1 Breast Cancer Syngeneic Mouse Model
Source: MDPI journal article supplement (doi:10.3390/molecules27196721), 2022-10-09
Supplement: s1 [file s1]

**AVA-NP-695 Selectively Inhibits ENPP1 to Activate STING Pathway and Abrogate Tumor  
Metastasis in 4T1 Breast Cancer Syngeneic Mouse Model**

Avijit Goswami<sup>a</sup>, Barnali Deb<sup>a</sup>, Sandeep Goyal<sup>a</sup>, Abhishek Gosavi<sup>a</sup>, Mukund Mali<sup>a</sup>, Ashwita M. Martis<sup>a</sup>, Princy khurana<sup>a</sup>, Mukesh Gangar<sup>a</sup>, Digambar Raykar<sup>a</sup>, Ankita Mohanty<sup>a</sup>, Aditya Kulkarni<sup>a,b,#</sup>

<sup>a</sup>Aten Porus Lifesciences, Bangalore 560068, India

<sup>b</sup>Avammune Therapeutics, 39, East Lane, Levittown, PA 19054, USA

<sup>#</sup>Corresponding Author

### Supplementary Figures

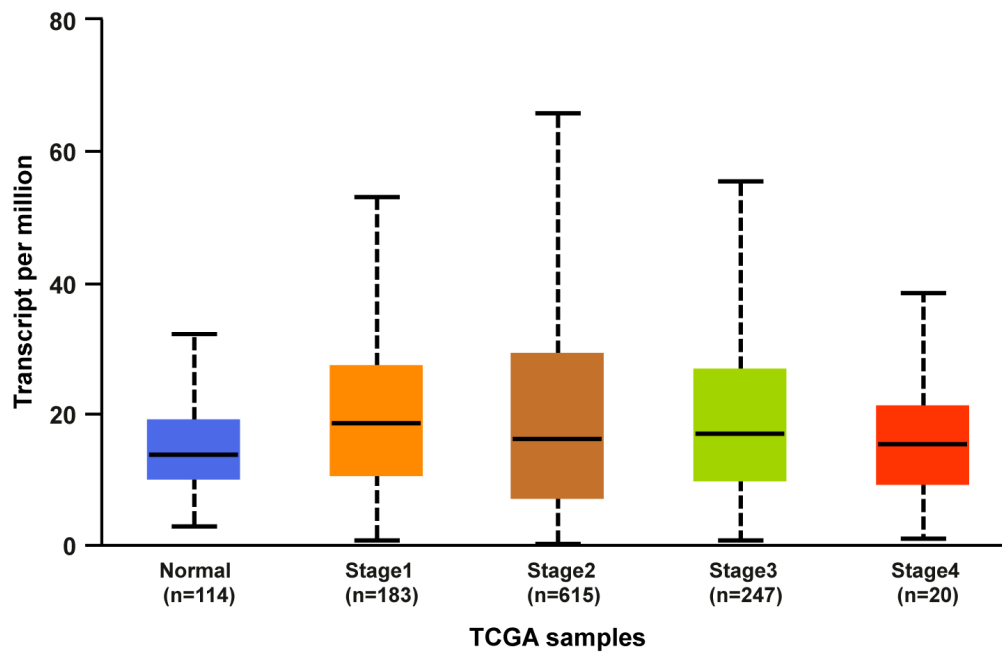

**Figure S1: The gene expression of *ENPP1* in TCGA dataset across breast cancer stages.** The mRNA levels (transcript per million) of *ENPP1* were plotted for different stages of breast cancer patients from the TCGA dataset (tumor tissue samples). The data analysis was carried out using the UALCAN analysis tool (<http://ualcan.path.uab.edu/index.html>).

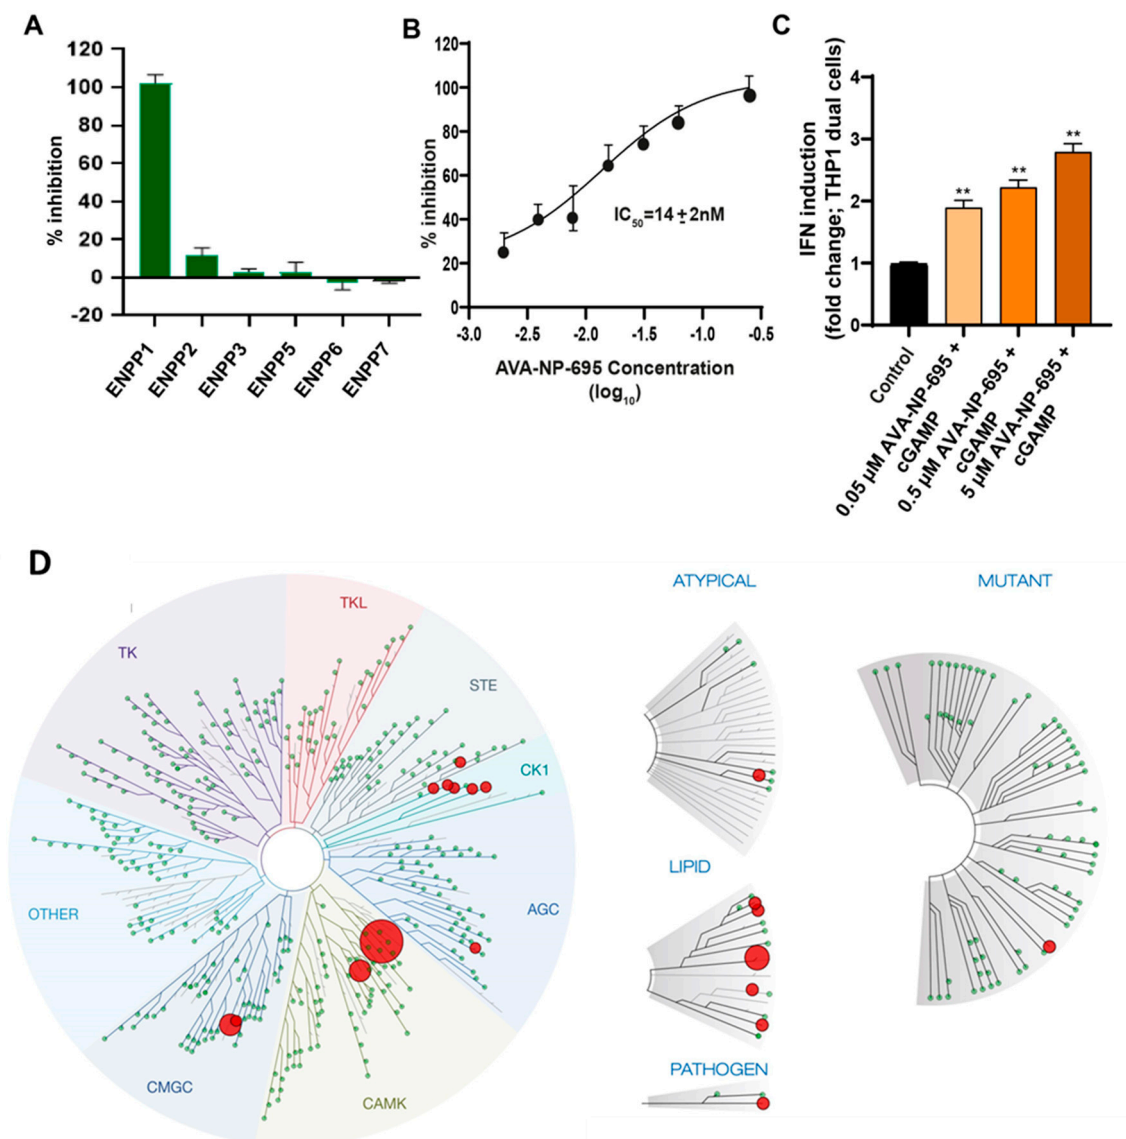

**Figure S2: Selectivity of AVA-NP-695 across isoforms and kinases.** (A) Selectivity assay for ENPP isoforms (NPP2, NPP5, NPP6 and NPP7) (B) Dose dependent inhibitory curve. 20 ng of ENPP1 was incubated with increasing concentration of AVA-NP-695 at 37°C followed by addition of 400 μM *p*-Nph-5'-TMP, incubated again at 37°C and reaction was terminated using 1 N NaOH. (C) THP1 Dual™ cells were treated with various concentration of AVA-NP-695 for 24h and luciferase assay was performed to check for IFN induction. All the groups were treated with 25 μM of 2'3'-cGAMP and the relative fold change was plotted using control group. (D) Selectivity of AVA-NP-695 was tested against 469 kinases at 10 μM concentration using KINOMEScan™ screening platform and image generated using TREEspot™ Software Tool and reprinted with permission from KINOMEScan®, a division of DiscoverRx Corporation, © DISCOVERX CORPORATION 2010.

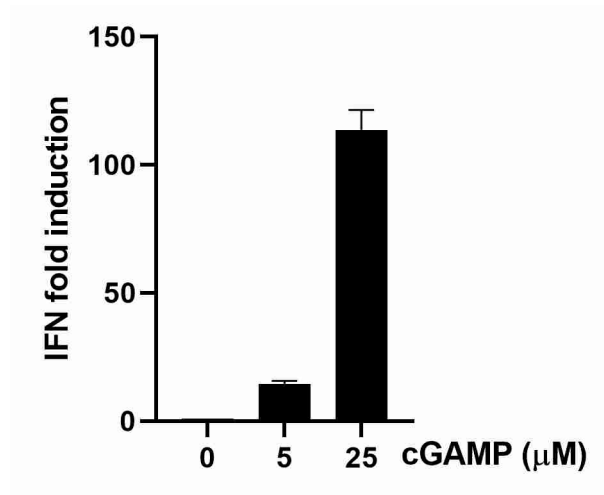

**Figure S3: Dose dependent effect of 2'3'-cGAMP on IFN induction in THP1 Dual™ cells.** THP1 Dual™ cells were treated with 5μM and 25 μM of 2'3'-cGAMP for 24 h; and the IFN induction was measured using QUANTI-Luc™ luciferase assay.

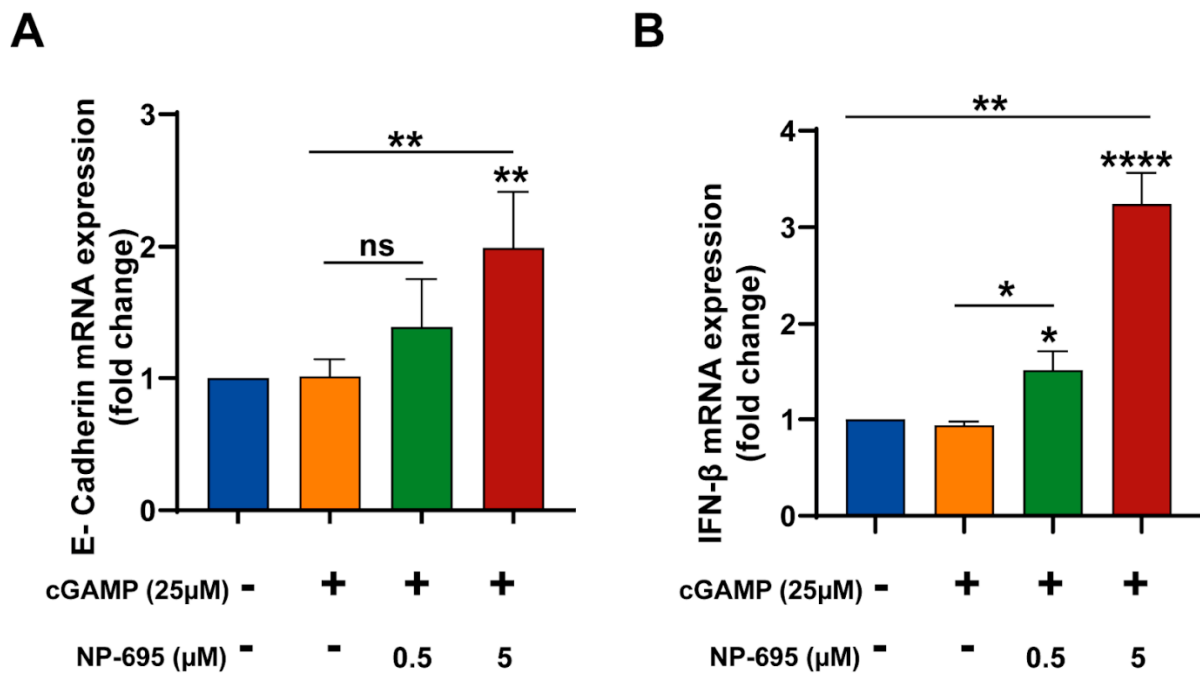

**Figure S4: Effect of cGAMP and ENPP1 inhibitor on E-cadherin and IFN-β in MDA-MB-231.** (A-B) MDA-MB 231 cells were treated with 2'3'-cGAMP (25 μM) in presence of 2 different concentration of ENPP1 inhibitor (0.5 μM and 5 μM); and the mRNA expression level of (A) *E-cad* (B) *IFN-β* was evaluated through Real Time PCR and data was normalized using GAPDH. \* $p < 0.05$ , \*\* $p < 0.01$ , \*\*\* $p < 0.001$ , \*\*\*\* $p < 0.0001$ .

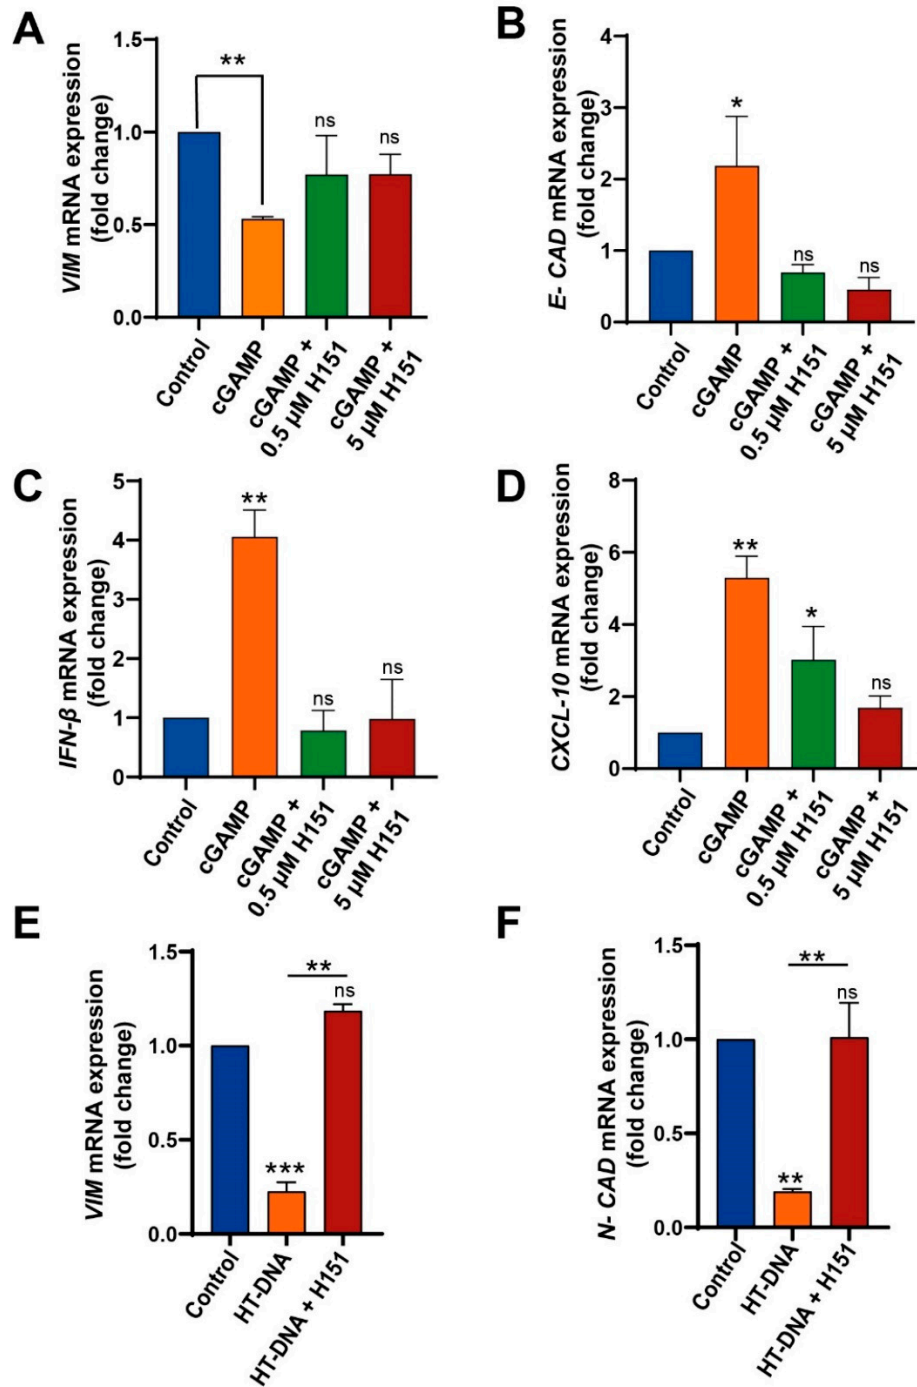

**Figure S5: Effect of 2'3'-cGAMP on EMT markers in low ENPP1 cells (A549) is mediated by STING.** A549 Dual™ cells were treated with STING inhibitor (H151) in combination with 2'3'-cGAMP (25 μM) and **(A)** *VIM* **(B)** *E-CAD* **(C)** *IFN-β* and **(D)** *CXCL-10* were quantified using Real Time PCR. All the data were normalized using GAPDH. **(E-F)** A549 Dual™ cells were treated with and without 5 μM of H151 for 1 h followed by transfection with 0.5 μg of HT-DNA. Control group were left untreated. Post 24 h treatment, *VIM* **(E)** and *E-CAD* **(F)** mRNA levels were quantified using RT-PCR

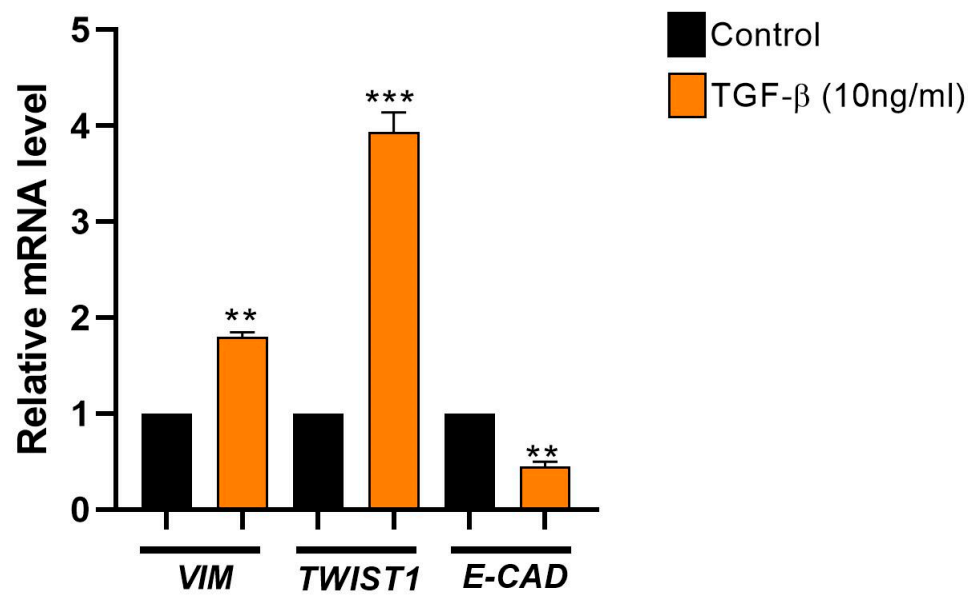

**Figure S6: TGF- $\beta$  treatment in MDA-MB-231 cells.** MDA-MB-231 cells were treated with 10 ng/ml of TGF- $\beta$  and *VIM*, *TWIST1* and *E-CAD* levels were estimated using RT-PCR. All data were normalized using GAPDH as endogenous control.

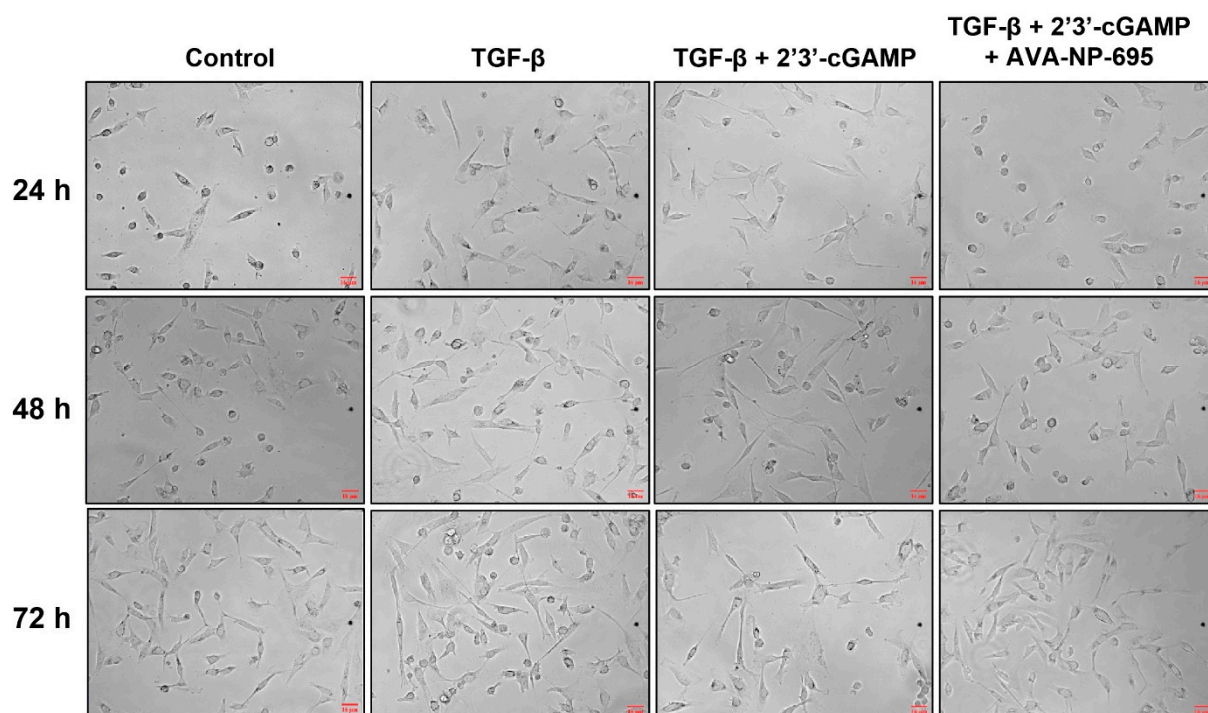

**Figure S7: Representative image to show the effect of 2'3'-cGAMP and TGF- $\beta$  in presence of AVA-NP-695 on the cell elongation of MDA MB-231 cells.** The TNBC cell line MDA-MB-231 were treated with different condition and phase contrast image were captured using Fluid microscope to quantify the changes in cell length (representative image with respect to Fig. 5).

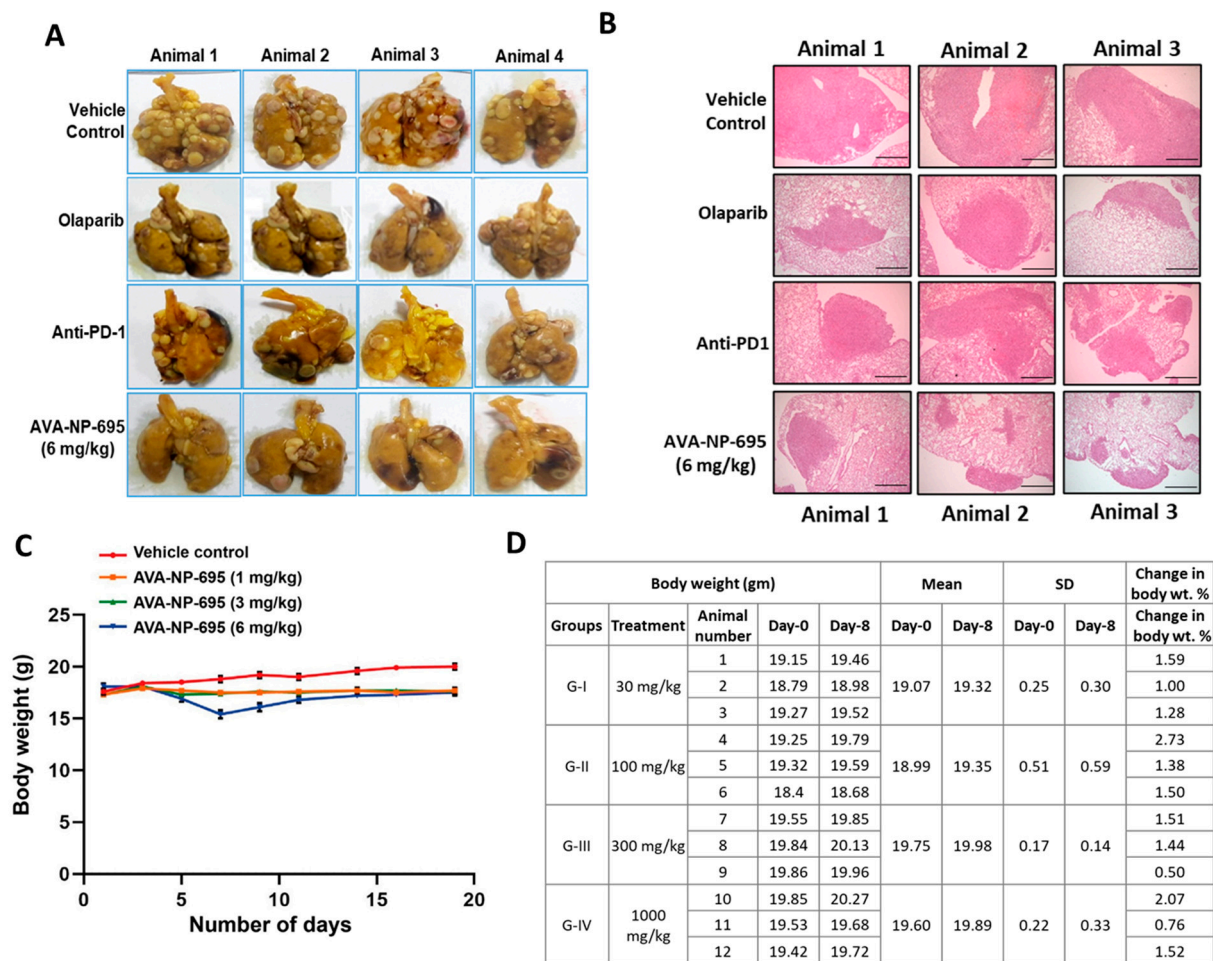

**Figure S8: Representative lung metastatic nodules and histopathology image with respect to Fig. 6 C (A), Fig. 6 D (B) and body weights graphs (C) for different treatment arms. Scale bar corresponds to 4000  $\mu$ m. (D)** Female BALB/C mice were treated with different concentration of AVA-NP-695 for 7 days and the body weight was documented at Day 0 and Day 8.



## Supplementary Tables

### Supplementary Table S2: Individual cell length post-treatment at 24 h, 48 h and 72 h

(related to figure 5 A-D)

**24h**

| Control | TGF- $\beta$ | TGF- $\beta$ +<br>cGAMP | TGF- $\beta$ +<br>cGAMP +<br>AVA-NP-695 |
|---------|--------------|-------------------------|-----------------------------------------|
| 17.717  | 51.796       | 25.087                  | 27.994                                  |
| 19.667  | 36.634       | 34.004                  | 34.207                                  |
| 21.606  | 28.198       | 28.297                  | 17.022                                  |
| 28.928  | 47.704       | 24.654                  | 30.187                                  |
| 17.45   | 37.558       | 20.502                  | 24.274                                  |
| 20.25   | 37.558       | 21.287                  | 21.057                                  |
| 24.142  | 31.833       | 23.322                  | 27.854                                  |
| 14.731  | 37.999       | 18.893                  | 41.785                                  |
| 22.669  | 82.7         | 31.369                  | 23.91                                   |
| 26.592  | 59.074       | 16.229                  | 18.305                                  |
| 10.078  | 76.255       | 23.311                  | 27.994                                  |
| 9.939   | 42.59        | 35.615                  | 34.207                                  |
| 18.376  | 34.786       | 29.303                  | 17.022                                  |
| 16.483  | 71.65        | 32.374                  | 30.187                                  |
| 24.012  | 29.933       | 48.523                  | 24.274                                  |
| 19.654  | 32.245       | 55.442                  | 21.057                                  |
| 23.367  | 31.43        | 27.966                  | 27.854                                  |
| 23.57   | 25.796       | 31.319                  | 41.785                                  |
| 21.123  | 35.887       | 25.125                  | 23.91                                   |
| 27.173  | 21.287       | 40.108                  | 18.305                                  |
| 24.271  | 22.78        | 17.331                  | 15.321                                  |
| 23.053  | 43.254       | 10.809                  | 21.032                                  |
| 23.337  | 41.023       | 13.288                  | 23.336                                  |
| 11.607  | 30.213       | 15.662                  | 25.254                                  |
| 34.2    | 22.021       | 36.25                   | 26.354                                  |
| 13.8    | 26.554       | 24.021                  | 40.215                                  |
| 7.862   | 32.025       | 22.112                  | 42.031                                  |
| 11.219  | 51.235       | 28.556                  | 20.025                                  |

## 48h

| Control | TGF- $\beta$ | TGF- $\beta$ +<br>cGAMP | TGF- $\beta$ +<br>cGAMP +<br>AVA-NP-695 |
|---------|--------------|-------------------------|-----------------------------------------|
| 20.518  | 56.869       | 71.485                  | 27.275                                  |
| 19.952  | 61.442       | 42.412                  | 30.153                                  |
| 11.524  | 58.513       | 26.117                  | 27.579                                  |
| 25.833  | 51.808       | 21.168                  | 22.115                                  |
| 19.588  | 41.083       | 24.756                  | 36.24                                   |
| 24.654  | 36.25        | 36.726                  | 25.756                                  |
| 23.102  | 60.244       | 33.333                  | 20.804                                  |
| 18.276  | 42.675       | 32.43                   | 46.056                                  |
| 30.442  | 51.653       | 56.452                  | 18.898                                  |
| 38.415  | 47.704       | 37.372                  | 31.386                                  |
| 22.81   | 45.894       | 57.01                   | 32.599                                  |
| 12.611  | 41.014       | 31.953                  | 25.957                                  |
| 24.224  | 47.909       | 29.241                  | 20.043                                  |
| 13.044  | 43.932       | 40.676                  | 19.194                                  |
| 20.687  | 37.268       | 34.593                  | 35.36                                   |
| 28.066  | 54.88        | 23.393                  | 32.495                                  |
| 19.76   | 46.912       | 57.108                  | 24.051                                  |
| 18.418  | 42.215       | 62.121                  | 29.583                                  |
| 19.454  | 35.785       | 44.363                  | 35.71                                   |
| 14.919  | 43.605       | 35.843                  | 28.29                                   |
| 22.036  | 41.083       | 56.153                  | 20.833                                  |
| 30.918  | 40.32        | 49.253                  | 13.156                                  |
| 31.128  | 28.544       | 45.924                  | 17.5                                    |
| 20.687  | 57.622       | 30.187                  | 35.419                                  |
| 27.588  | 43.908       | 24.509                  | 27.087                                  |
| 18.028  | 41.113       | 24.756                  | 31.669                                  |
| 31.891  | 51.25        | 44.653                  | 26.352                                  |
| 24.513  | 48.376       | 20.366                  | 36.886                                  |
| 28.52   | 46.098       | 34.004                  | 38.193                                  |
| 20.194  | 47.788       | 40.494                  | 31.002                                  |
| 18.418  | 54.038       | 19.917                  | 26.813                                  |
| 17.936  | 72.806       | 60.533                  | 27.415                                  |
| 23.113  | 29.241       | 56.312                  | 43.116                                  |
| 10.035  | 45.417       | 16.341                  | 33.326                                  |
| 11.785  | 56.869       | 20.833                  | 25.087                                  |
| 10.549  | 61.442       | 49.211                  | 17.225                                  |
| 16.271  | 58.513       | 49.025                  | 14.349                                  |
| 16.796  | 51.808       | 77.555                  | 21.81                                   |
| 15.685  | 41.083       | 45.966                  | 19.167                                  |

|        |        |        |        |
|--------|--------|--------|--------|
| 11.464 | 36.25  | 49.008 | 26.104 |
| 22.989 | 60.244 | 47.788 | 26.014 |
| 20.434 | 42.675 | 41.164 | 16.776 |
| 19.588 | 51.653 | 26.748 | 26.276 |
| 25.583 | 45.213 | 23.192 | 38.263 |
| 21.032 | 50.223 | 52.879 | 21.989 |
| 32.127 | 53.235 | 22.146 | 36.384 |
| 26.874 | 52.023 | 17.624 | 34.291 |
| 22.427 | 56.235 | 16.713 | 30.084 |
| 21.671 | 41.021 | 17.766 | 23.158 |
| 32.449 | 38.112 | 21.38  | 19.508 |
| 28.198 | 32.014 | 43.016 | 19.003 |
| 24.456 | 39.322 | 19.369 | 29.794 |
| 19.117 | 46.998 | 27.389 | 30.259 |
| 24.044 | 45.214 | 52.15  | 10.491 |
| 12.169 | 41.236 | 38.956 | 16.008 |
| 19.742 | 50.235 | 29.107 | 33.046 |

## 72 h

| <b>Control</b> | <b>TGF-<math>\beta</math></b> | <b>TGF-<math>\beta</math> +<br/>cGAMP</b> | <b>TGF-<math>\beta</math> +<br/>cGAMP +<br/>AVA-NP-695</b> |
|----------------|-------------------------------|-------------------------------------------|------------------------------------------------------------|
| 27.966         | 79.005                        | 42.793                                    | 26.543                                                     |
| 30.76          | 60.457                        | 49.38                                     | 30.382                                                     |
| 30.42          | 43.02                         | 36.539                                    | 19.76                                                      |
| 32.018         | 73.245                        | 31.896                                    | 20.7                                                       |
| 27.528         | 21.246                        | 48.357                                    | 24.615                                                     |
| 29.383         | 44.404                        | 35.129                                    | 24.17                                                      |
| 30.757         | 31.647                        | 29.489                                    | 28.115                                                     |
| 29.516         | 67.789                        | 42.584                                    | 11.524                                                     |
| 33.593         | 61.288                        | 50.118                                    | 20.485                                                     |
| 25.827         | 65.418                        | 48.378                                    | 11.219                                                     |
| 20.017         | 37.843                        | 34.139                                    | 20.833                                                     |
| 27.163         | 36.31                         | 30.052                                    | 14.959                                                     |
| 26.5           | 53.865                        | 31.691                                    | 38.831                                                     |
| 16.796         | 71.595                        | 50.064                                    | 39.528                                                     |
| 20.349         | 40.631                        | 30.233                                    | 32.94                                                      |
| 18.583         | 41.516                        | 41.039                                    | 30.971                                                     |
| 29.63          | 31.097                        | 43.782                                    | 17.525                                                     |
| 20.97          | 28.241                        | 27.265                                    | 27.342                                                     |
| 28.346         | 63.45                         | 41.841                                    | 15.366                                                     |
| 41.384         | 35.064                        | 45.189                                    | 30.462                                                     |
| 23.603         | 57.63                         | 33.917                                    | 21.429                                                     |
| 35.269         | 43.161                        | 33.76                                     | 28.361                                                     |

|        |         |        |        |
|--------|---------|--------|--------|
| 26.306 | 73.591  | 37.834 | 30.075 |
| 36.524 | 45.539  | 41.777 | 28.198 |
| 26.748 | 71.318  | 42.983 | 21.449 |
| 16.029 | 35.843  | 65.294 | 13.649 |
| 30.556 | 51.243  | 38.006 | 19.085 |
| 26.813 | 47.041  | 50.621 | 20.9   |
| 29.089 | 70.52   | 42.533 | 23.143 |
| 25.997 | 61.681  | 34.646 | 26.104 |
| 23.322 | 112.067 | 43.519 | 20.937 |
| 21.767 | 43.924  | 40.929 | 30.348 |
| 32.513 | 40.716  | 36.764 | 34.586 |
| 35.456 | 50.09   | 66.334 | 11.585 |
| 28.336 | 65.734  | 48.448 | 29.533 |
| 16.966 | 41.604  | 40.539 | 40.827 |
| 31.496 | 56.864  | 37.687 | 16.667 |
| 25.611 | 49.812  | 94.503 | 27.945 |
| 27.767 | 107.717 | 40.322 | 20.833 |
| 26.224 | 60.625  | 30.937 | 33.932 |
| 20.022 | 48.591  | 49.304 | 26.874 |
| 24.051 | 30.599  | 54.823 | 24.456 |
| 17.445 | 43.231  | 60.56  | 34.006 |
| 24.559 | 41.959  | 41.754 | 29.557 |
| 23.049 | 50.937  | 38.364 | 12.507 |
| 23.928 | 43.167  | 39.225 | 18.191 |
| 17.678 | 35.129  | 45.026 | 27.163 |
| 27.591 | 107.529 | 49.998 | 23.337 |
| 28.167 | 57.185  | 56.351 | 36.917 |
| 29.098 | 55.041  | 61.025 | 33.863 |
| 21.989 | 37.843  | 40.256 | 35.855 |
| 31.757 | 43.995  | 41.665 | 24.972 |
| 16.008 | 41.332  | 49.984 | 12.388 |
| 20.804 | 65.321  | 45.213 | 9.138  |

**Supplementary table S3: Primer sequence list**

| Gene                           | Species | Forward Primer          | Reverse Primer               |
|--------------------------------|---------|-------------------------|------------------------------|
| <b>E-Cadherin</b>              | Human   | GCCTCCTGAAAAGAGAGTGGAAG | TGGCAGTGTCTCTCCAAATCCG       |
| <b>N-Cadherin</b>              | Human   | CCTCCAGAGTTTACTGCCATGAC | GTAGGATCTCCGCCACTGATTC       |
| <b>Vimentin</b>                | Human   | AGGCAAAGCAGGAGTCCACTGA  | ATCTGGCGTTCCAGGGACTCAT       |
| <b>Twist</b>                   | Human   | GCCAGGTACATCGACTTCCTCT  | TCCATCCTCCAGACCGAGAAGG       |
| <b>IFN-<math>\beta</math></b>  | Human   | AGTAGGCGACACTGTTCTGTG   | GCCTCCCATTC AATTGCCAC        |
| <b>IL-6</b>                    | Human   | AGACAGCCACTCACCTCTTCAG  | TTCTGCCAGTGCCTCTTTGCTG       |
| <b>IL-8</b>                    | Human   | GAGAGAGAGAGAGAGAGAGA    | CACA ACC CTC TGC ACC CAG TTT |
| <b>CXCL-10</b>                 | Human   | GGTGAGAAGAGATGTCTGAATCC | GTCCATCCTTGGAAGCACTGCA       |
| <b>ENPP-1</b>                  | Human   | CGATTTTGCCGATTGAGGATT   | AA CTGGTGCTGGGAAAGAAGACA     |
| <b>TGF-<math>\beta</math></b>  | Human   | TACCTGAACCCGTGTTGCTCTC  | GTTGCTGAGGTATCGCCAGGAA       |
| <b>TNF-<math>\alpha</math></b> | Human   | CTCTTCTGCCTGCTGCACTTTG  | ATGGGCTACAGGCTTGCTACTC       |
| <b>GAPDH</b>                   | Human   | GTCTCCTCTGACTTCAACAGCG  | ACCACCCTGTTGCTGTAGCCAA       |
| <b>E-Cadherin</b>              | Mouse   | GGTCATCAGTGTGCTCACCTCT  | GCTGTTGTGCTCAAGCCTTCAC       |
| <b>N-Cadherin</b>              | Mouse   | AGGGTGGACGTCATTGTAGC    | CTGTTGGGGTCTGTCAGGAT         |
| <b>Vimentin</b>                | Mouse   | ATGCTTCTCTGGCACGTCTT    | AGCCACGCTTTCATACTGCT         |
| <b>Twist</b>                   | Mouse   | GGCCGGAGACCTAGATGTCATT  | CTGGGAATCTCTGTCCACGG         |
| <b>CXCL10</b>                  | Mouse   | ATCATCCCTGCGAGCCTATCCT  | GACCTTTTTTGGCTAAACGCTTTC     |
| <b>IFN-<math>\beta</math></b>  | Mouse   | GCCTTTGCCATCCAAGAGATGC  | ACACTGTCTGCTGGTGGAGTTC       |
| <b>GAPDH</b>                   | Mouse   | CATCACTGCCACCCAGAAGACTG | ATGCCAGTGAGCTTCCCGTTTCAG     |
