# Supplementary material for: AVA-NP-695 Selectively Inhibits ENPP1 to Activate STING Pathway and Abrogate Tumor Metastasis in 4T1 Breast Cancer Syngeneic Mouse Model
Source: Molecules. 2022 Oct 9;27(19):6721. doi: 10.3390/molecules27196721 (PMC9573294; doi:10.3390/molecules27196721)
Supplement: Supplementary file 1 [file molecules-27-06721-s001.zip › Supplementary table S1 Raw data for kinome panel.csv]

Compound Name	DiscoveRx Gene Symbol	Entrez Gene Symbol	Percent Control	Compound Concentration (nM)
AVA-NP-695	AAK1	AAK1	72	10000
AVA-NP-695	ABL1(E255K)-phosphorylated	ABL1	61	10000
AVA-NP-695	ABL1(F317I)-nonphosphorylated	ABL1	63	10000
AVA-NP-695	ABL1(F317I)-phosphorylated	ABL1	57	10000
AVA-NP-695	ABL1(F317L)-nonphosphorylated	ABL1	65	10000
AVA-NP-695	ABL1(F317L)-phosphorylated	ABL1	90	10000
AVA-NP-695	ABL1(H396P)-nonphosphorylated	ABL1	50	10000
AVA-NP-695	ABL1(H396P)-phosphorylated	ABL1	64	10000
AVA-NP-695	ABL1(M351T)-phosphorylated	ABL1	76	10000
AVA-NP-695	ABL1(Q252H)-nonphosphorylated	ABL1	84	10000
AVA-NP-695	ABL1(Q252H)-phosphorylated	ABL1	66	10000
AVA-NP-695	ABL1(T315I)-nonphosphorylated	ABL1	71	10000
AVA-NP-695	ABL1(T315I)-phosphorylated	ABL1	82	10000
AVA-NP-695	ABL1(Y253F)-phosphorylated	ABL1	62	10000
AVA-NP-695	ABL1-nonphosphorylated	ABL1	51	10000
AVA-NP-695	ABL1-phosphorylated	ABL1	73	10000
AVA-NP-695	ABL2	ABL2	87	10000
AVA-NP-695	ACVR1	ACVR1	89	10000
AVA-NP-695	ACVR1B	ACVR1B	100	10000
AVA-NP-695	ACVR2A	ACVR2A	100	10000
AVA-NP-695	ACVR2B	ACVR2B	98	10000
AVA-NP-695	ACVRL1	ACVRL1	89	10000
AVA-NP-695	ADCK3	CABC1	60	10000
AVA-NP-695	ADCK4	ADCK4	73	10000
AVA-NP-695	AKT1	AKT1	100	10000
AVA-NP-695	AKT2	AKT2	99	10000
AVA-NP-695	AKT3	AKT3	97	10000
AVA-NP-695	ALK	ALK	88	10000
AVA-NP-695	ALK(C1156Y)	ALK	73	10000
AVA-NP-695	ALK(L1196M)	ALK	67	10000
AVA-NP-695	AMPK-alpha1	PRKAA1	69	10000
AVA-NP-695	AMPK-alpha2	PRKAA2	95	10000
AVA-NP-695	ANKK1	ANKK1	86	10000
AVA-NP-695	ARK5	NUAK1	100	10000
AVA-NP-695	ASK1	MAP3K5	93	10000
AVA-NP-695	ASK2	MAP3K6	84	10000
AVA-NP-695	AURKA	AURKA	45	10000
AVA-NP-695	AURKB	AURKB	95	10000
AVA-NP-695	AURKC	AURKC	90	10000
AVA-NP-695	AXL	AXL	89	10000
AVA-NP-695	BIKE	BMP2K	58	10000
AVA-NP-695	BLK	BLK	99	10000
AVA-NP-695	BMPR1A	BMPR1A	100	10000
AVA-NP-695	BMPR1B	BMPR1B	68	10000
AVA-NP-695	BMPR2	BMPR2	80	10000
AVA-NP-695	BMX	BMX	96	10000
AVA-NP-695	BRAF	BRAF	76	10000
AVA-NP-695	BRAF(V600E)	BRAF	65	10000
AVA-NP-695	BRK	PTK6	86	10000
AVA-NP-695	BRSK1	BRSK1	78	10000
AVA-NP-695	BRSK2	BRSK2	100	10000
AVA-NP-695	BTK	BTK	76	10000
AVA-NP-695	BUB1	BUB1	99	10000
AVA-NP-695	CAMK1	CAMK1	56	10000
AVA-NP-695	CAMK1B	PNCK	80	10000
AVA-NP-695	CAMK1D	CAMK1D	82	10000
AVA-NP-695	CAMK1G	CAMK1G	82	10000
AVA-NP-695	CAMK2A	CAMK2A	99	10000
AVA-NP-695	CAMK2B	CAMK2B	92	10000
AVA-NP-695	CAMK2D	CAMK2D	82	10000
AVA-NP-695	CAMK2G	CAMK2G	99	10000
AVA-NP-695	CAMK4	CAMK4	95	10000
AVA-NP-695	CAMKK1	CAMKK1	85	10000
AVA-NP-695	CAMKK2	CAMKK2	94	10000
AVA-NP-695	CASK	CASK	75	10000
AVA-NP-695	CDC2L1	CDK11B	92	10000
AVA-NP-695	CDC2L2	CDC2L2	90	10000
AVA-NP-695	CDC2L5	CDK13	82	10000
AVA-NP-695	CDK11	CDK19	88	10000
AVA-NP-695	CDK2	CDK2	85	10000
AVA-NP-695	CDK3	CDK3	94	10000
AVA-NP-695	CDK4	CDK4	100	10000
AVA-NP-695	CDK4-cyclinD1	CDK4	74	10000
AVA-NP-695	CDK4-cyclinD3	CDK4	90	10000
AVA-NP-695	CDK5	CDK5	97	10000
AVA-NP-695	CDK7	CDK7	39	10000
AVA-NP-695	CDK8	CDK8	98	10000
AVA-NP-695	CDK9	CDK9	96	10000
AVA-NP-695	CDKL1	CDKL1	69	10000
AVA-NP-695	CDKL2	CDKL2	68	10000
AVA-NP-695	CDKL3	CDKL3	87	10000
AVA-NP-695	CDKL5	CDKL5	74	10000
AVA-NP-695	CHEK1	CHEK1	85	10000
AVA-NP-695	CHEK2	CHEK2	63	10000
AVA-NP-695	CIT	CIT	77	10000
AVA-NP-695	CLK1	CLK1	68	10000
AVA-NP-695	CLK2	CLK2	80	10000
AVA-NP-695	CLK3	CLK3	82	10000
AVA-NP-695	CLK4	CLK4	92	10000
AVA-NP-695	CSF1R	CSF1R	76	10000
AVA-NP-695	CSF1R-autoinhibited	CSF1R	58	10000
AVA-NP-695	CSK	CSK	88	10000
AVA-NP-695	CSNK1A1	CSNK1A1	28	10000
AVA-NP-695	CSNK1A1L	CSNK1A1L	41	10000
AVA-NP-695	CSNK1D	CSNK1D	33	10000
AVA-NP-695	CSNK1E	CSNK1E	25	10000
AVA-NP-695	CSNK1G1	CSNK1G1	28	10000
AVA-NP-695	CSNK1G2	CSNK1G2	41	10000
AVA-NP-695	CSNK1G3	CSNK1G3	30	10000
AVA-NP-695	CSNK2A1	CSNK2A1	83	10000
AVA-NP-695	CSNK2A2	CSNK2A2	51	10000
AVA-NP-695	CTK	MATK	47	10000
AVA-NP-695	DAPK1	DAPK1	95	10000
AVA-NP-695	DAPK2	DAPK2	0	10000
AVA-NP-695	DAPK3	DAPK3	40	10000
AVA-NP-695	DCAMKL1	DCLK1	92	10000
AVA-NP-695	DCAMKL2	DCLK2	80	10000
AVA-NP-695	DCAMKL3	DCLK3	90	10000
AVA-NP-695	DDR1	DDR1	89	10000
AVA-NP-695	DDR2	DDR2	92	10000
AVA-NP-695	DLK	MAP3K12	48	10000
AVA-NP-695	DMPK	DMPK	59	10000
AVA-NP-695	DMPK2	CDC42BPG	96	10000
AVA-NP-695	DRAK1	STK17A	90	10000
AVA-NP-695	DRAK2	STK17B	87	10000
AVA-NP-695	DYRK1A	DYRK1A	10	10000
AVA-NP-695	DYRK1B	DYRK1B	63	10000
AVA-NP-695	DYRK2	DYRK2	1.1	10000
AVA-NP-695	EGFR	EGFR	99	10000
AVA-NP-695	EGFR(E746-A750del)	EGFR	100	10000
AVA-NP-695	EGFR(G719C)	EGFR	98	10000
AVA-NP-695	EGFR(G719S)	EGFR	89	10000
AVA-NP-695	EGFR(L747-E749del, A750P)	EGFR	98	10000
AVA-NP-695	EGFR(L747-S752del, P753S)	EGFR	95	10000
AVA-NP-695	EGFR(L747-T751del,Sins)	EGFR	94	10000
AVA-NP-695	EGFR(L858R)	EGFR	97	10000
AVA-NP-695	EGFR(L858R,T790M)	EGFR	88	10000
AVA-NP-695	EGFR(L861Q)	EGFR	96	10000
AVA-NP-695	EGFR(S752-I759del)	EGFR	95	10000
AVA-NP-695	EGFR(T790M)	EGFR	71	10000
AVA-NP-695	EIF2AK1	EIF2AK1	70	10000
AVA-NP-695	EPHA1	EPHA1	73	10000
AVA-NP-695	EPHA2	EPHA2	100	10000
AVA-NP-695	EPHA3	EPHA3	82	10000
AVA-NP-695	EPHA4	EPHA4	95	10000
AVA-NP-695	EPHA5	EPHA5	88	10000
AVA-NP-695	EPHA6	EPHA6	100	10000
AVA-NP-695	EPHA7	EPHA7	89	10000
AVA-NP-695	EPHA8	EPHA8	89	10000
AVA-NP-695	EPHB1	EPHB1	91	10000
AVA-NP-695	EPHB2	EPHB2	98	10000
AVA-NP-695	EPHB3	EPHB3	97	10000
AVA-NP-695	EPHB4	EPHB4	95	10000
AVA-NP-695	EPHB6	EPHB6	64	10000
AVA-NP-695	ERBB2	ERBB2	100	10000
AVA-NP-695	ERBB3	ERBB3	87	10000
AVA-NP-695	ERBB4	ERBB4	77	10000
AVA-NP-695	ERK1	MAPK3	100	10000
AVA-NP-695	ERK2	MAPK1	97	10000
AVA-NP-695	ERK3	MAPK6	98	10000
AVA-NP-695	ERK4	MAPK4	95	10000
AVA-NP-695	ERK5	MAPK7	96	10000
AVA-NP-695	ERK8	MAPK15	83	10000
AVA-NP-695	ERN1	ERN1	60	10000
AVA-NP-695	FAK	PTK2	97	10000
AVA-NP-695	FER	FER	88	10000
AVA-NP-695	FES	FES	94	10000
AVA-NP-695	FGFR1	FGFR1	91	10000
AVA-NP-695	FGFR2	FGFR2	100	10000
AVA-NP-695	FGFR3	FGFR3	100	10000
AVA-NP-695	FGFR3(G697C)	FGFR3	100	10000
AVA-NP-695	FGFR4	FGFR4	95	10000
AVA-NP-695	FGR	FGR	100	10000
AVA-NP-695	FLT1	FLT1	96	10000
AVA-NP-695	FLT3	FLT3	99	10000
AVA-NP-695	FLT3(D835H)	FLT3	100	10000
AVA-NP-695	FLT3(D835V)	FLT3	93	10000
AVA-NP-695	FLT3(D835Y)	FLT3	100	10000
AVA-NP-695	FLT3(ITD)	FLT3	76	10000
AVA-NP-695	FLT3(ITD,D835V)	FLT3	91	10000
AVA-NP-695	FLT3(ITD,F691L)	FLT3	97	10000
AVA-NP-695	FLT3(K663Q)	FLT3	90	10000
AVA-NP-695	FLT3(N841I)	FLT3	57	10000
AVA-NP-695	FLT3(R834Q)	FLT3	70	10000
AVA-NP-695	FLT3-autoinhibited	FLT3	85	10000
AVA-NP-695	FLT4	FLT4	100	10000
AVA-NP-695	FRK	FRK	95	10000
AVA-NP-695	FYN	FYN	89	10000
AVA-NP-695	GAK	GAK	64	10000
AVA-NP-695	GCN2(Kin.Dom.2,S808G)	EIF2AK4	100	10000
AVA-NP-695	GRK1	GRK1	81	10000
AVA-NP-695	GRK2	ADRBK1	100	10000
AVA-NP-695	GRK3	ADRBK2	82	10000
AVA-NP-695	GRK4	GRK4	100	10000
AVA-NP-695	GRK7	GRK7	65	10000
AVA-NP-695	GSK3A	GSK3A	92	10000
AVA-NP-695	GSK3B	GSK3B	88	10000
AVA-NP-695	HASPIN	GSG2	62	10000
AVA-NP-695	HCK	HCK	72	10000
AVA-NP-695	HIPK1	HIPK1	67	10000
AVA-NP-695	HIPK2	HIPK2	51	10000
AVA-NP-695	HIPK3	HIPK3	76	10000
AVA-NP-695	HIPK4	HIPK4	78	10000
AVA-NP-695	HPK1	MAP4K1	81	10000
AVA-NP-695	HUNK	HUNK	100	10000
AVA-NP-695	ICK	ICK	73	10000
AVA-NP-695	IGF1R	IGF1R	100	10000
AVA-NP-695	IKK-alpha	CHUK	91	10000
AVA-NP-695	IKK-beta	IKBKB	73	10000
AVA-NP-695	IKK-epsilon	IKBKE	56	10000
AVA-NP-695	INSR	INSR	77	10000
AVA-NP-695	INSRR	INSRR	94	10000
AVA-NP-695	IRAK1	IRAK1	84	10000
AVA-NP-695	IRAK3	IRAK3	76	10000
AVA-NP-695	IRAK4	IRAK4	65	10000
AVA-NP-695	ITK	ITK	84	10000
AVA-NP-695	JAK1(JH1domain-catalytic)	JAK1	100	10000
AVA-NP-695	JAK1(JH2domain-pseudokinase)	JAK1	81	10000
AVA-NP-695	JAK2(JH1domain-catalytic)	JAK2	65	10000
AVA-NP-695	JAK3(JH1domain-catalytic)	JAK3	56	10000
AVA-NP-695	JNK1	MAPK8	49	10000
AVA-NP-695	JNK2	MAPK9	51	10000
AVA-NP-695	JNK3	MAPK10	62	10000
AVA-NP-695	KIT	KIT	84	10000
AVA-NP-695	KIT(A829P)	KIT	92	10000
AVA-NP-695	KIT(D816H)	KIT	75	10000
AVA-NP-695	KIT(D816V)	KIT	100	10000
AVA-NP-695	KIT(L576P)	KIT	77	10000
AVA-NP-695	KIT(V559D)	KIT	78	10000
AVA-NP-695	KIT(V559D,T670I)	KIT	76	10000
AVA-NP-695	KIT(V559D,V654A)	KIT	90	10000
AVA-NP-695	KIT-autoinhibited	KIT	76	10000
AVA-NP-695	LATS1	LATS1	92	10000
AVA-NP-695	LATS2	LATS2	100	10000
AVA-NP-695	LCK	LCK	92	10000
AVA-NP-695	LIMK1	LIMK1	91	10000
AVA-NP-695	LIMK2	LIMK2	100	10000
AVA-NP-695	LKB1	STK11	100	10000
AVA-NP-695	LOK	STK10	74	10000
AVA-NP-695	LRRK2	LRRK2	71	10000
AVA-NP-695	LRRK2(G2019S)	LRRK2	35	10000
AVA-NP-695	LTK	LTK	93	10000
AVA-NP-695	LYN	LYN	95	10000
AVA-NP-695	LZK	MAP3K13	100	10000
AVA-NP-695	MAK	MAK	94	10000
AVA-NP-695	MAP3K1	MAP3K1	83	10000
AVA-NP-695	MAP3K15	MAP3K15	77	10000
AVA-NP-695	MAP3K2	MAP3K2	64	10000
AVA-NP-695	MAP3K3	MAP3K3	60	10000
AVA-NP-695	MAP3K4	MAP3K4	100	10000
AVA-NP-695	MAP4K2	MAP4K2	80	10000
AVA-NP-695	MAP4K3	MAP4K3	95	10000
AVA-NP-695	MAP4K4	MAP4K4	100	10000
AVA-NP-695	MAP4K5	MAP4K5	94	10000
AVA-NP-695	MAPKAPK2	MAPKAPK2	80	10000
AVA-NP-695	MAPKAPK5	MAPKAPK5	66	10000
AVA-NP-695	MARK1	MARK1	81	10000
AVA-NP-695	MARK2	MARK2	74	10000
AVA-NP-695	MARK3	MARK3	87	10000
AVA-NP-695	MARK4	MARK4	100	10000
AVA-NP-695	MAST1	MAST1	89	10000
AVA-NP-695	MEK1	MAP2K1	92	10000
AVA-NP-695	MEK2	MAP2K2	99	10000
AVA-NP-695	MEK3	MAP2K3	70	10000
AVA-NP-695	MEK4	MAP2K4	55	10000
AVA-NP-695	MEK5	MAP2K5	61	10000
AVA-NP-695	MEK6	MAP2K6	100	10000
AVA-NP-695	MELK	MELK	100	10000
AVA-NP-695	MERTK	MERTK	96	10000
AVA-NP-695	MET	MET	99	10000
AVA-NP-695	MET(M1250T)	MET	85	10000
AVA-NP-695	MET(Y1235D)	MET	90	10000
AVA-NP-695	MINK	MINK1	87	10000
AVA-NP-695	MKK7	MAP2K7	96	10000
AVA-NP-695	MKNK1	MKNK1	96	10000
AVA-NP-695	MKNK2	MKNK2	76	10000
AVA-NP-695	MLCK	MYLK3	95	10000
AVA-NP-695	MLK1	MAP3K9	100	10000
AVA-NP-695	MLK2	MAP3K10	86	10000
AVA-NP-695	MLK3	MAP3K11	90	10000
AVA-NP-695	MRCKA	CDC42BPA	73	10000
AVA-NP-695	MRCKB	CDC42BPB	97	10000
AVA-NP-695	MST1	STK4	86	10000
AVA-NP-695	MST1R	MST1R	98	10000
AVA-NP-695	MST2	STK3	74	10000
AVA-NP-695	MST3	STK24	99	10000
AVA-NP-695	MST4	MST4	71	10000
AVA-NP-695	MTOR	MTOR	42	10000
AVA-NP-695	MUSK	MUSK	95	10000
AVA-NP-695	MYLK	MYLK	51	10000
AVA-NP-695	MYLK2	MYLK2	98	10000
AVA-NP-695	MYLK4	MYLK4	79	10000
AVA-NP-695	MYO3A	MYO3A	88	10000
AVA-NP-695	MYO3B	MYO3B	99	10000
AVA-NP-695	NDR1	STK38	84	10000
AVA-NP-695	NDR2	STK38L	100	10000
AVA-NP-695	NEK1	NEK1	96	10000
AVA-NP-695	NEK10	NEK10	57	10000
AVA-NP-695	NEK11	NEK11	98	10000
AVA-NP-695	NEK2	NEK2	80	10000
AVA-NP-695	NEK3	NEK3	77	10000
AVA-NP-695	NEK4	NEK4	86	10000
AVA-NP-695	NEK5	NEK5	94	10000
AVA-NP-695	NEK6	NEK6	94	10000
AVA-NP-695	NEK7	NEK7	77	10000
AVA-NP-695	NEK9	NEK9	76	10000
AVA-NP-695	NIK	MAP3K14	79	10000
AVA-NP-695	NIM1	MGC42105	77	10000
AVA-NP-695	NLK	NLK	78	10000
AVA-NP-695	OSR1	OXSR1	51	10000
AVA-NP-695	p38-alpha	MAPK14	95	10000
AVA-NP-695	p38-beta	MAPK11	99	10000
AVA-NP-695	p38-delta	MAPK13	97	10000
AVA-NP-695	p38-gamma	MAPK12	61	10000
AVA-NP-695	PAK1	PAK1	89	10000
AVA-NP-695	PAK2	PAK2	83	10000
AVA-NP-695	PAK3	PAK3	75	10000
AVA-NP-695	PAK4	PAK4	92	10000
AVA-NP-695	PAK6	PAK6	63	10000
AVA-NP-695	PAK7	PAK7	96	10000
AVA-NP-695	PCTK1	CDK16	78	10000
AVA-NP-695	PCTK2	CDK17	88	10000
AVA-NP-695	PCTK3	CDK18	86	10000
AVA-NP-695	PDGFRA	PDGFRA	81	10000
AVA-NP-695	PDGFRB	PDGFRB	85	10000
AVA-NP-695	PDPK1	PDPK1	93	10000
AVA-NP-695	PFCDPK1(P.falciparum)	CDPK1	90	10000
AVA-NP-695	PFPK5(P.falciparum)	MAL13P1.279	100	10000
AVA-NP-695	PFTAIRE2	CDK15	75	10000
AVA-NP-695	PFTK1	CDK14	85	10000
AVA-NP-695	PHKG1	PHKG1	82	10000
AVA-NP-695	PHKG2	PHKG2	2.4	10000
AVA-NP-695	PIK3C2B	PIK3C2B	70	10000
AVA-NP-695	PIK3C2G	PIK3C2G	69	10000
AVA-NP-695	PIK3CA	PIK3CA	50	10000
AVA-NP-695	PIK3CA(C420R)	PIK3CA	70	10000
AVA-NP-695	PIK3CA(E542K)	PIK3CA	78	10000
AVA-NP-695	PIK3CA(E545A)	PIK3CA	88	10000
AVA-NP-695	PIK3CA(E545K)	PIK3CA	89	10000
AVA-NP-695	PIK3CA(H1047L)	PIK3CA	51	10000
AVA-NP-695	PIK3CA(H1047Y)	PIK3CA	100	10000
AVA-NP-695	PIK3CA(I800L)	PIK3CA	99	10000
AVA-NP-695	PIK3CA(M1043I)	PIK3CA	81	10000
AVA-NP-695	PIK3CA(Q546K)	PIK3CA	62	10000
AVA-NP-695	PIK3CB	PIK3CB	64	10000
AVA-NP-695	PIK3CD	PIK3CD	30	10000
AVA-NP-695	PIK3CG	PIK3CG	34	10000
AVA-NP-695	PIK4CB	PI4KB	3.3	10000
AVA-NP-695	PIKFYVE	PIKFYVE	91	10000
AVA-NP-695	PIM1	PIM1	95	10000
AVA-NP-695	PIM2	PIM2	100	10000
AVA-NP-695	PIM3	PIM3	100	10000
AVA-NP-695	PIP5K1A	PIP5K1A	86	10000
AVA-NP-695	PIP5K1C	PIP5K1C	15	10000
AVA-NP-695	PIP5K2B	PIP4K2B	87	10000
AVA-NP-695	PIP5K2C	PIP4K2C	23	10000
AVA-NP-695	PKAC-alpha	PRKACA	93	10000
AVA-NP-695	PKAC-beta	PRKACB	99	10000
AVA-NP-695	PKMYT1	PKMYT1	81	10000
AVA-NP-695	PKN1	PKN1	100	10000
AVA-NP-695	PKN2	PKN2	96	10000
AVA-NP-695	PKNB(M.tuberculosis)	pknB	32	10000
AVA-NP-695	PLK1	PLK1	92	10000
AVA-NP-695	PLK2	PLK2	69	10000
AVA-NP-695	PLK3	PLK3	80	10000
AVA-NP-695	PLK4	PLK4	82	10000
AVA-NP-695	PRKCD	PRKCD	82	10000
AVA-NP-695	PRKCE	PRKCE	96	10000
AVA-NP-695	PRKCH	PRKCH	100	10000
AVA-NP-695	PRKCI	PRKCI	65	10000
AVA-NP-695	PRKCQ	PRKCQ	100	10000
AVA-NP-695	PRKD1	PRKD1	87	10000
AVA-NP-695	PRKD2	PRKD2	100	10000
AVA-NP-695	PRKD3	PRKD3	100	10000
AVA-NP-695	PRKG1	PRKG1	96	10000
AVA-NP-695	PRKG2	PRKG2	59	10000
AVA-NP-695	PRKR	EIF2AK2	97	10000
AVA-NP-695	PRKX	PRKX	76	10000
AVA-NP-695	PRP4	PRPF4B	100	10000
AVA-NP-695	PYK2	PTK2B	81	10000
AVA-NP-695	QSK	KIAA0999	85	10000
AVA-NP-695	RAF1	RAF1	96	10000
AVA-NP-695	RET	RET	92	10000
AVA-NP-695	RET(M918T)	RET	100	10000
AVA-NP-695	RET(V804L)	RET	100	10000
AVA-NP-695	RET(V804M)	RET	84	10000
AVA-NP-695	RIOK1	RIOK1	68	10000
AVA-NP-695	RIOK2	RIOK2	14	10000
AVA-NP-695	RIOK3	RIOK3	77	10000
AVA-NP-695	RIPK1	RIPK1	100	10000
AVA-NP-695	RIPK2	RIPK2	86	10000
AVA-NP-695	RIPK4	RIPK4	57	10000
AVA-NP-695	RIPK5	DSTYK	59	10000
AVA-NP-695	ROCK1	ROCK1	68	10000
AVA-NP-695	ROCK2	ROCK2	66	10000
AVA-NP-695	ROS1	ROS1	74	10000
AVA-NP-695	RPS6KA4(Kin.Dom.1-N-terminal)	RPS6KA4	90	10000
AVA-NP-695	RPS6KA4(Kin.Dom.2-C-terminal)	RPS6KA4	57	10000
AVA-NP-695	RPS6KA5(Kin.Dom.1-N-terminal)	RPS6KA5	100	10000
AVA-NP-695	RPS6KA5(Kin.Dom.2-C-terminal)	RPS6KA5	79	10000
AVA-NP-695	RSK1(Kin.Dom.1-N-terminal)	RPS6KA1	71	10000
AVA-NP-695	RSK1(Kin.Dom.2-C-terminal)	RPS6KA1	90	10000
AVA-NP-695	RSK2(Kin.Dom.1-N-terminal)	RPS6KA3	44	10000
AVA-NP-695	RSK2(Kin.Dom.2-C-terminal)	RPS6KA3	79	10000
AVA-NP-695	RSK3(Kin.Dom.1-N-terminal)	RPS6KA2	99	10000
AVA-NP-695	RSK3(Kin.Dom.2-C-terminal)	RPS6KA2	95	10000
AVA-NP-695	RSK4(Kin.Dom.1-N-terminal)	RPS6KA6	46	10000
AVA-NP-695	RSK4(Kin.Dom.2-C-terminal)	RPS6KA6	91	10000
AVA-NP-695	S6K1	RPS6KB1	100	10000
AVA-NP-695	SBK1	SBK1	90	10000
AVA-NP-695	SGK	SGK1	30	10000
AVA-NP-695	SgK110	SgK110	100	10000
AVA-NP-695	SGK2	SGK2	65	10000
AVA-NP-695	SGK3	SGK3	51	10000
AVA-NP-695	SIK	SIK1	94	10000
AVA-NP-695	SIK2	SIK2	100	10000
AVA-NP-695	SLK	SLK	93	10000
AVA-NP-695	SNARK	NUAK2	57	10000
AVA-NP-695	SNRK	SNRK	100	10000
AVA-NP-695	SRC	SRC	91	10000
AVA-NP-695	SRMS	SRMS	92	10000
AVA-NP-695	SRPK1	SRPK1	94	10000
AVA-NP-695	SRPK2	SRPK2	95	10000
AVA-NP-695	SRPK3	SRPK3	100	10000
AVA-NP-695	STK16	STK16	70	10000
AVA-NP-695	STK33	STK33	99	10000
AVA-NP-695	STK35	STK35	68	10000
AVA-NP-695	STK36	STK36	95	10000
AVA-NP-695	STK39	STK39	80	10000
AVA-NP-695	SYK	SYK	87	10000
AVA-NP-695	TAK1	MAP3K7	94	10000
AVA-NP-695	TAOK1	TAOK1	70	10000
AVA-NP-695	TAOK2	TAOK2	81	10000
AVA-NP-695	TAOK3	TAOK3	76	10000
AVA-NP-695	TBK1	TBK1	55	10000
AVA-NP-695	TEC	TEC	79	10000
AVA-NP-695	TESK1	TESK1	98	10000
AVA-NP-695	TGFBR1	TGFBR1	98	10000
AVA-NP-695	TGFBR2	TGFBR2	93	10000
AVA-NP-695	TIE1	TIE1	84	10000
AVA-NP-695	TIE2	TEK	90	10000
AVA-NP-695	TLK1	TLK1	85	10000
AVA-NP-695	TLK2	TLK2	89	10000
AVA-NP-695	TNIK	TNIK	97	10000
AVA-NP-695	TNK1	TNK1	93	10000
AVA-NP-695	TNK2	TNK2	92	10000
AVA-NP-695	TNNI3K	TNNI3K	90	10000
AVA-NP-695	TRKA	NTRK1	92	10000
AVA-NP-695	TRKB	NTRK2	75	10000
AVA-NP-695	TRKC	NTRK3	54	10000
AVA-NP-695	TRPM6	TRPM6	42	10000
AVA-NP-695	TSSK1B	TSSK1B	96	10000
AVA-NP-695	TSSK3	TSSK3	59	10000
AVA-NP-695	TTK	TTK	54	10000
AVA-NP-695	TXK	TXK	87	10000
AVA-NP-695	TYK2(JH1domain-catalytic)	TYK2	91	10000
AVA-NP-695	TYK2(JH2domain-pseudokinase)	TYK2	100	10000
AVA-NP-695	TYRO3	TYRO3	99	10000
AVA-NP-695	ULK1	ULK1	63	10000
AVA-NP-695	ULK2	ULK2	77	10000
AVA-NP-695	ULK3	ULK3	65	10000
AVA-NP-695	VEGFR2	KDR	83	10000
AVA-NP-695	VPS34	PIK3C3	56	10000
AVA-NP-695	VRK2	VRK2	62	10000
AVA-NP-695	WEE1	WEE1	91	10000
AVA-NP-695	WEE2	WEE2	86	10000
AVA-NP-695	WNK1	WNK1	100	10000
AVA-NP-695	WNK2	WNK2	90	10000
AVA-NP-695	WNK3	WNK3	94	10000
AVA-NP-695	WNK4	WNK4	87	10000
AVA-NP-695	YANK1	STK32A	74	10000
AVA-NP-695	YANK2	STK32B	100	10000
AVA-NP-695	YANK3	STK32C	99	10000
AVA-NP-695	YES	YES1	77	10000
AVA-NP-695	YSK1	STK25	99	10000
AVA-NP-695	YSK4	MAP3K19	26	10000
AVA-NP-695	ZAK	ZAK	100	10000
AVA-NP-695	ZAP70	ZAP70	99	10000
